# Supplementary material
Source: PubMed Central journal article supplement (PMC3545764)
Supplement: 1201390110_pnas.201201390SI.pdf [file 1201390110_pnas.201201390SI.pdf]

# Supporting Information

Furuta et al. 10.1073/pnas.1201390110

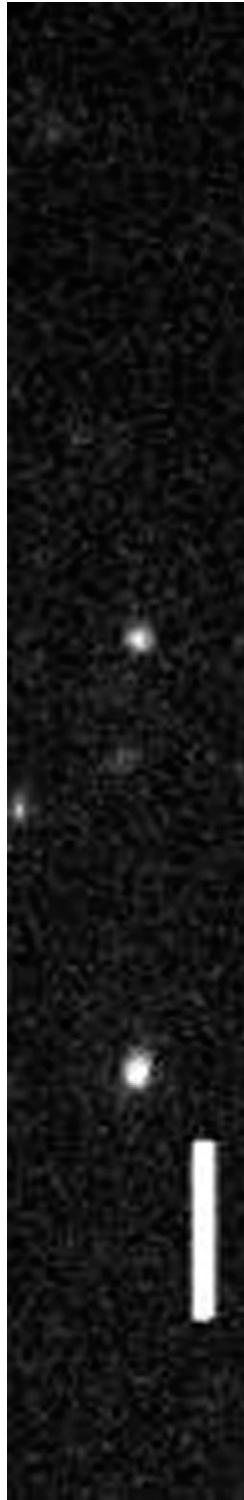

**Movie S1.** Movement of single kinesin-1 motors attached to a DNA scaffold (shown at 10.7× real time). (Scale bars, 3  $\mu\text{m}$ .)

[Movie S1](#)

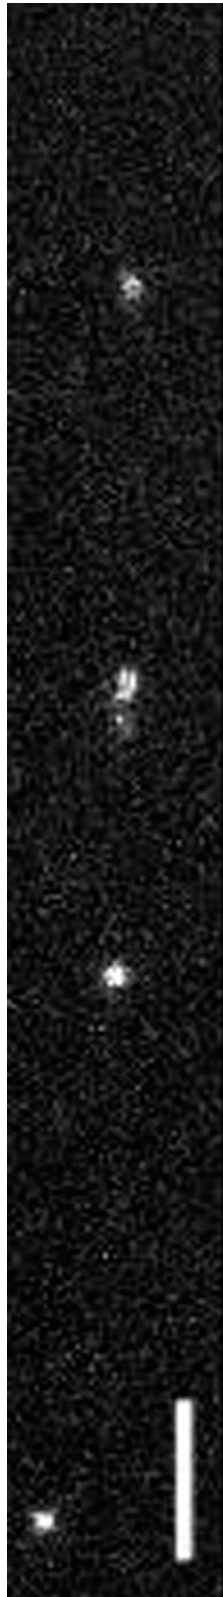

**Movie S2.** Movement of four kinesin-1 motors attached to a DNA scaffold (shown at 10.7× real time). (Scale bars, 3  $\mu\text{m}$ .)

[Movie S2](#)

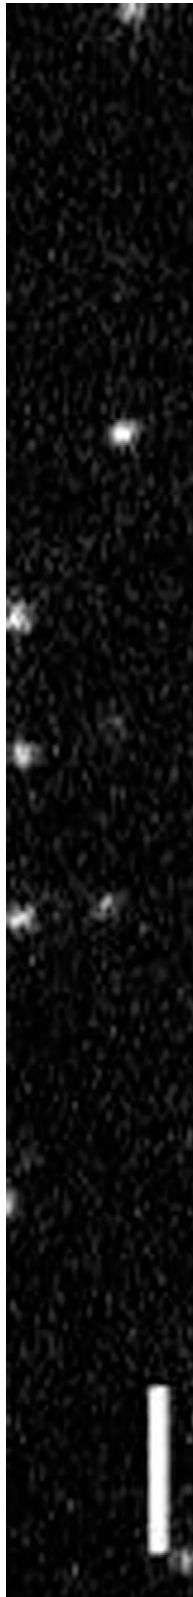

**Movie S3.** Movement of two Ncds attached to a DNA scaffold (shown at 10.7x real time). (Scale bars, 3  $\mu\text{m}$ .)

[Movie S3](#)

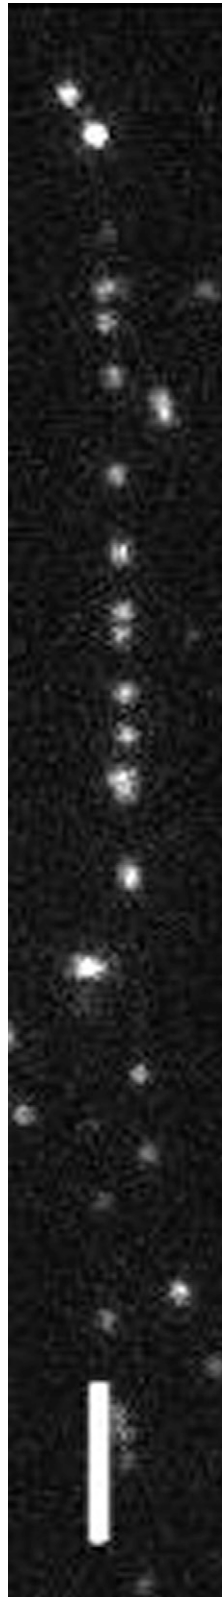

**Movie S4.** Movement of four Ncds attached to a DNA scaffold (shown at 10.7x real time). (Scale bars, 3  $\mu\text{m}$ .)

[Movie S4](#)

## Other Supporting Information Files

[SI Appendix \(PDF\)](#)
